# Supplementary material
Source: Research Square preprint supplement (doi:10.21203/rs.3.rs-8921143/v1)
Supplement: Supplementary file 1 [file 91768bee5d829913792e50dd.xlsx]

## Sheet: Table 1
	Time-Window	BCR::ABL1 transcript level (all participants)	Log(ratio) or Log(IS) SD slope	p value of slope	Slope of percent of labs on IS	Correlation with slope of percentage of labs on IS	p value of correlation
	Early (2009A-2015A)	High	-0.027	<0.001	7.68 (p<.001)	-0.73	0.004
		Intermediate	-0.032	<0.001		-0.71	0.022
		Low	-0.038	<0.001		-0.84	0.002
	Middle (2015B-2019A)	High	NS	0.31	0.89 (p=.003)	NS	0.68
		Intermediate	NS	0.2		NS	0.94
		Low	-0.037	<0.001		NS	0.23
	Late (2019B-2023B)	High	NS	0.41	NS (p=0.30)	NS	0.97
		Intermediate	0.009	0.003		NS	0.06
		Low	NS	0.61		NS	0.39
	Time- Window	(IS only participants)
	(2012-2019A)	High	NA	NA	3.19 (p<.001)	NA	NA
		Intermediate	-0.01	<0.001		-0.69	0.018
		Low	-0.012	0.003		NS	0.37
	Late (2019B-2023B)	High	NS	0.41	NS (p=0.30)	NS	0.97
		Intermediate	0.009	0.003		NS	0.06
		Low	NS	0.61		NS	0.39
	NS= not significant
	NA = data not available (no IS data available for the “High” transcript level from 2012-2016)
